# Supplementary material
Source: Elsevier journal article supplement (https://comptes-rendus.academie-sciences.fr/chimie/article/10.1016/j.crci.2008.12.004/file/attach/mmc1.pdf)
Supplement: mmc1 [file mmc1.pdf]

***Supplementary Material***  
***for Comptes-Rendus Chimie***

*Article number 3114*

---

**Synthesis of Functional Heterometallic Complexes and Clusters, their Self-Assembly on Gold Surfaces and X-ray Photoelectron Spectroscopic Studies**

**Pierre Croizat,<sup>a</sup> Frank Müller,<sup>b</sup> Hubert Mantz,<sup>b</sup> Andreas Englisch,<sup>b</sup> Stefan Hübner,<sup>\*b</sup>  
and Pierre Braunstein<sup>\*a</sup>**

<sup>a</sup> *Laboratoire de Chimie de Coordination, Institut de Chimie (UMR 7177 CNRS), Université de Strasbourg, 4 rue Blaise Pascal, F-67070 Strasbourg Cedex, France (E-mail: braunstein@chimie.u-strasbg.fr)*

<sup>b</sup> *Institut für Experimental Physik, Universität des Saarlandes, Postfach 151150, D-66041 Saarbrücken, Germany (E-mail: huefner@mx.uni-saarland.de)*

---

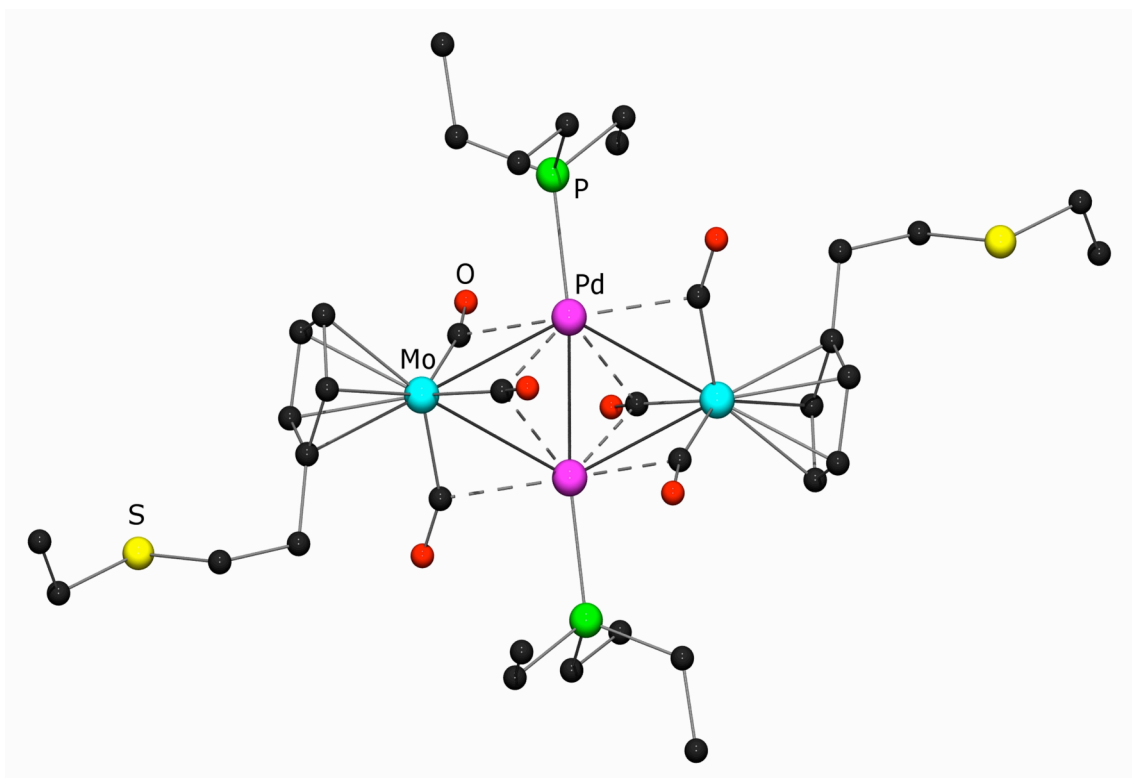

**Figure 1b.** View of the crystal structure of **5**

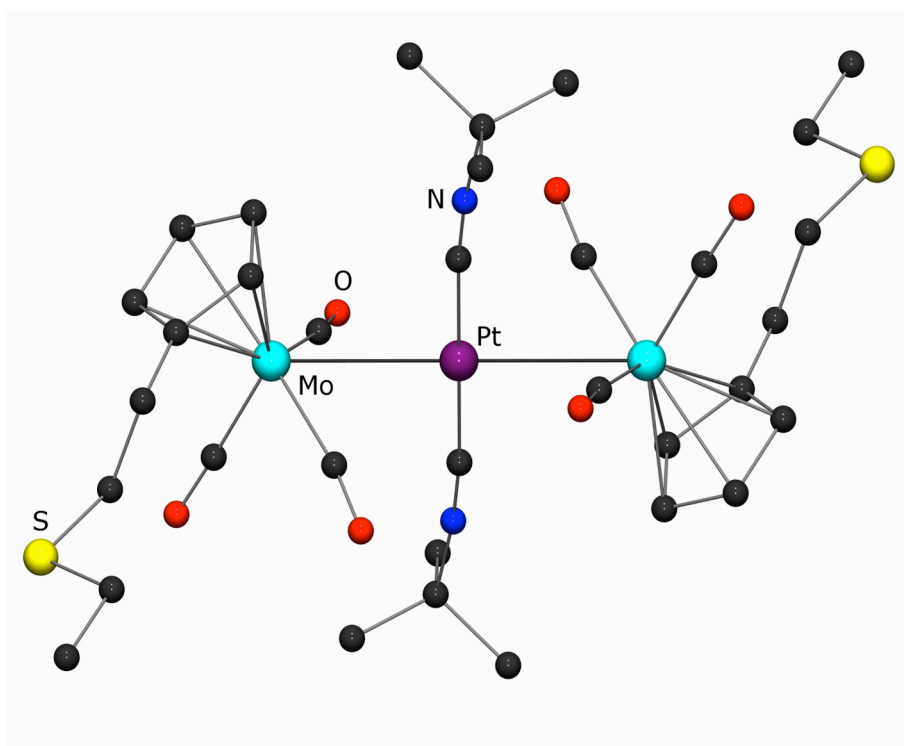

**Figure 2b.** View of the crystal structure of **6**

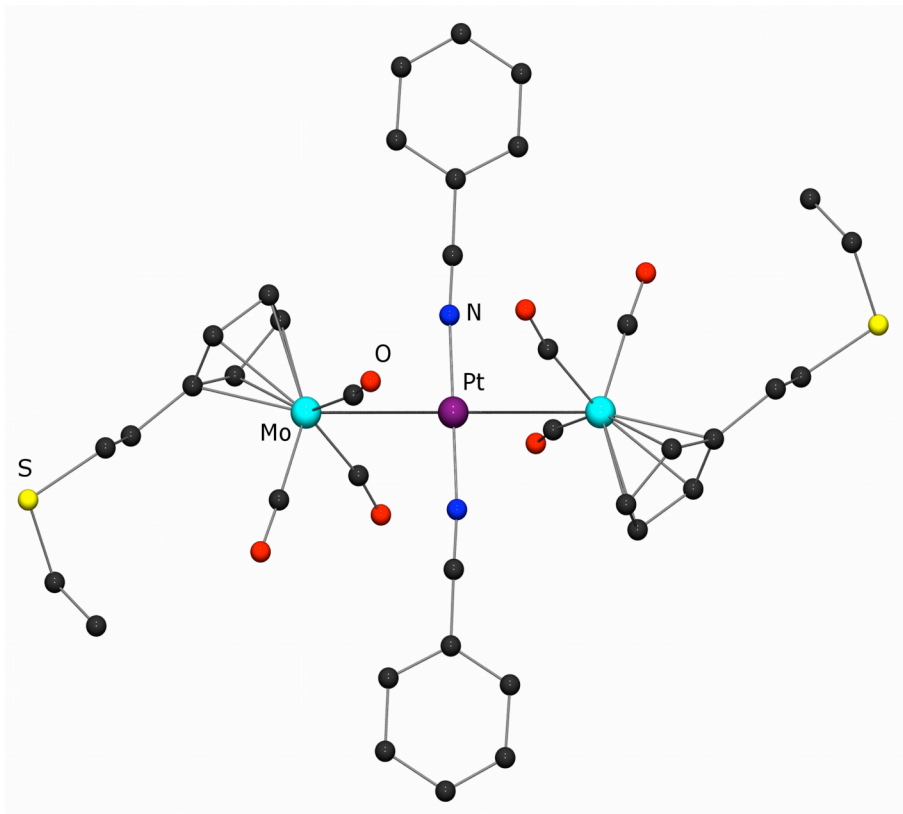

**Figure 3b.** View of the crystal structure of **7**

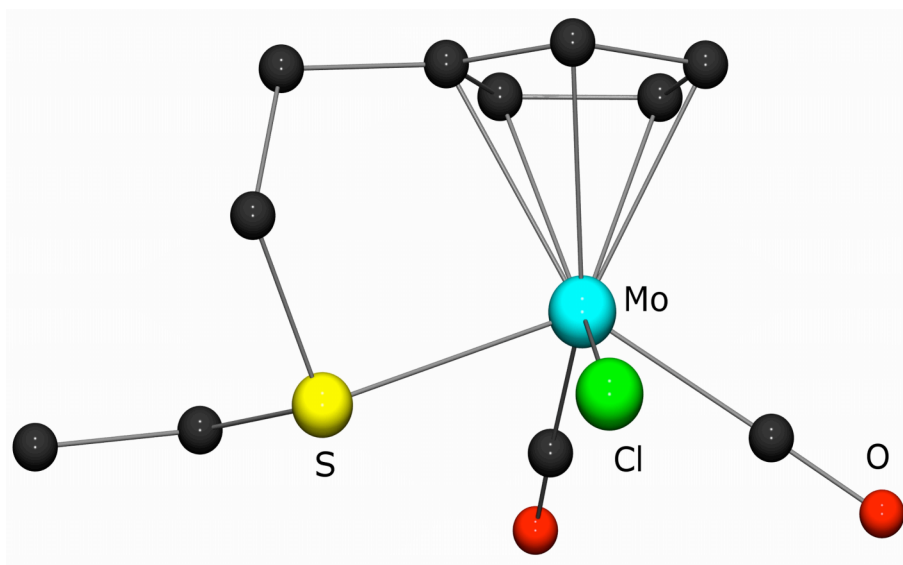

**Figure 4b.** View of the crystal structure of **8**
